1 **Title**

2 **Prevalence of viral frequency-dependent infection in coastal marine prokaryotes**  
3 **revealed using monthly time series virome analysis**

4

5 **Running title**

6 Viral frequency-dependent selection in marine prokaryotes

7

8 **Authors and affiliations**

9 Kento Tominaga<sup>1,2</sup>, Nana Ogawa-Haruki<sup>1</sup>, Yosuke Nishimura<sup>3</sup>, Hiroyasu Watai<sup>1</sup>, Keigo  
10 Yamamoto<sup>4</sup>, Hiroyuki Ogata<sup>5\*</sup>, Takashi Yoshida<sup>1\*</sup>

11 <sup>1</sup>Graduate School of Agriculture, Kyoto University, Kitashirakawa-Oiwake, Sakyo-ku,  
12 Kyoto, 606-8502, Japan

13 <sup>2</sup>Graduate School of Frontier Sciences, The University of Tokyo, Kashiwanoha, Kashiwa-  
14 shi, Chiba, 277-0882, Japan

15 <sup>3</sup>Atmosphere and Ocean Research Institute, The University of Tokyo, Kashiwanoha,  
16 Kashiwa-shi, Chiba, 277-8564, Japan

17 <sup>4</sup>Research Institute of Environment, Agriculture and Fisheries, Osaka Prefecture,  
18 Tanagawatanigawa, Misaki-cho, Sennan-gun, Osaka, 599-0311, Osaka, Japan

19 <sup>5</sup>Institute for Chemical Research, Kyoto University, Gokasho, Uji, Kyoto, 611-0011

20 Japan

21

22 **Correspondence:**

23 Takashi Yoshida; Graduate School of Agriculture, Kyoto University, Kitashirakawa-

24 Oiwake, Sakyo-ku, Kyoto, 606-8502, Japan; [yoshida.takashi.7a@kyoto-u.ac.jp](mailto:yoshida.takashi.7a@kyoto-u.ac.jp), , +8175-

25 753-6217

26 Hiroyuki Ogata; Institute for Chemical Research, Kyoto University, Gokasho, Uji, Kyoto,

27 611-0011 Japan; [ogata@kuicr.kyoto-u.ac.jp](mailto:ogata@kuicr.kyoto-u.ac.jp), +8177-438-3270

28

29 **Abstract**

30 Viruses infecting marine prokaryotes have large impacts on the diversity and dynamics  
31 of their hosts. Model systems suggest viral infection is frequency-dependent and  
32 constrained by the virus-host encounter rate. However, it is unclear whether the  
33 frequency-dependent infection is pervasive among the abundant prokaryotic populations  
34 with different growth strategies (i.e. *r*-strategy and *K*-strategy). To address this question,  
35 we performed a comparison of prokaryotic and viral communities using 16S rRNA  
36 amplicon and virome sequencing based on samples collected monthly for two years at a  
37 Japanese coastal site, Osaka Bay. Concurrent seasonal shifts observed in prokaryotic and  
38 viral community dynamics indicated that abundances of viruses correlated with that of  
39 their predicted host phyla (or classes). Co-occurrence network analysis between abundant  
40 prokaryotes and viruses revealed 6 423 co-occurring pairs, suggesting a tight coupling of  
41 host and viral abundances and their “one to many” correspondence. Although dominant  
42 *K*-strategist like species, such as SAR11, showed few co-occurring viruses, a fast  
43 succession of their viruses suggests viruses infecting these populations changed  
44 continuously. Our results suggest the frequency-dependent viral infection prevailed in  
45 coastal marine prokaryotes regardless of host taxa and growth strategy.

46

## 47 **Introduction**

48 Marine prokaryotes are ubiquitous in the ocean and play key roles in the global  
49 biogeochemical processes [1]. Most of observed species (>35,000 species-level  
50 operational taxonomic units [OTUs], based on 97% 16S rRNA sequence identity) fall  
51 into several major taxa (phyla or classes for Proteobacteria), such as  $\alpha$ -Proteobacteria (e.g.  
52 SAR11), Bacteroidetes (e.g. *Flavobacteriaceae*), and Cyanobacteria (e.g. *Synechococcus*  
53 and *Prochlorococcus*) [2, 3]. Although individual species have distinct ecological niches,  
54 they are often classified into one of two growth strategists based on their potential growth  
55 rate and temporal dynamics: (i) *K*-strategist (slow-growing and persistently dominant, e.g.  
56 SAR11) and (ii) *r*-strategist (fast-growing and opportunistic, e.g. *Flavobacteriaceae*) [4].  
57 However, recent high-frequency sampling schemes (e.g. daily) uncovered that species not  
58 recognized as *r*-strategists exhibit drastic fluctuations (e.g. Marine Group II  
59 euryarchaeota) [5, 6]. Further, finely resolved populations (genotypes or strains) within a  
60 species-level OTU often show distinct temporal dynamics [7–11], indicating species  
61 described as *K*-strategist can show frequent fluctuation.

62 Viruses infecting prokaryotes are abundantly present in the ocean and estimated  
63 to lyse 20–40% of the prokaryotic cells each day [4, 12, 13]. Viruses are thought to infect  
64 their specific hosts (often restricted to strains within a species) in a frequency-dependent

65 manner, in which the encounter rate between the viruses and their hosts is a determinant  
66 for the infection rate [14, 15]. Thus, viruses infect host populations that become abundant  
67 and frequencies of host and viruses oscillate over time, leading to the maintenance of the  
68 diversity of the host community [16, 17]. Moreover, mathematical models have  
69 demonstrated that a prokaryotic species with faster growth rate can be susceptible to viral  
70 infection [17]. This trend allows *K*-strategists to reach a higher abundance than *r*-  
71 strategists because of their higher resistance against viral infection by cryptic escape  
72 through reduced cell size and/or specialized defense mechanisms [4, 18]. However, the  
73 discovery of SAR11 viruses questions this prediction [19]. It is currently unclear whether  
74 *K-strategists* suffer from viral infection or viral infection is prevalent in abundant  
75 prokaryotes regardless of their growth strategies..

76 Previous monthly observations of microbial communities have revealed that  
77 seasonal oceanographic features have a strong influence on the prokaryotic community  
78 [20, 21]. Seasonal variability of viral community also have been reported using PCR-  
79 based analysis [22, 23] and viral metagenomics (viromics) [24–26]. Although viruses are  
80 obligate parasites, viral seasonality was often discussed independently from the  
81 seasonality of their hosts except for few prokaryotic-virus pairs (e.g.

82 *Synechococcus/Prochlorococcus*) [23, 27] because of the difficulty in connecting  
83 uncultured viruses and their hosts [13, 28].

84 In this study, we aimed to solve the two fundamental questions whether viral  
85 infection is prevalent among abundant prokaryotic populations or the way viruses infect  
86 differs depending on the taxa and/or growth strategies of their hosts. For this purpose, we  
87 monitored prokaryotic and viral communities at a eutrophic coastal site, Osaka Bay,  
88 monthly for two-years. We compare the community dynamics of viruses and that of their  
89 putative hosts using the *in silico* host prediction analysis [29, 30] and prevalence of viral  
90 infection is discussed based on the potential virus-host pairs determined through their co-  
91 occurrence dynamics.

## 92 **Materials and methods**

### 93 **Sampling and processing**

94 Seawater samples (4 l) were collected at a 5 m depth at the entrance of Osaka  
95 Bay (34°19'28"N, 135°7'15"E), Japan, within 3 h before or after high tide, between March  
96 2015 and November 2016, at monthly intervals. Seawater was filtered through a 142 mm-  
97 diameter (3.0 µm pore size) polycarbonate membrane (Millipore, Billerica, MA) and then  
98 sequentially through 0.22 µm-pore Sterivex filtration units (SVG010RS, EMD

99 Millipore). After filtration, filtration units were directly stored at -80 °C for subsequent  
100 DNA extraction. The filtrates were stored at 4°C before treatments. Water temperature  
101 and salinity were monitored using fixed water intake systems of the Research Institute of  
102 Environment, Agriculture and Fisheries, Osaka prefecture. Nutrient concentrations (NO<sub>3</sub>-  
103 N, NO<sub>2</sub>-N, NH<sub>4</sub>-N, PO<sub>4</sub>-P, and SiO<sub>2</sub>-Si) were measured by continuous flow analysis (BL  
104 TEC K.K., Japan.).

#### 105 **rRNA gene amplicon sequencing analysis**

106 For prokaryotic community analysis, DNA was extracted from the stored  
107 filtration units as previously described [31, 32]. Total 16S rDNA was amplified using a  
108 primer set based on the V3–V4 hypervariable region of prokaryotic 16 S rRNA genes  
109 [33] with added overhang adapter sequences at each 5' end according to the sample  
110 preparation guide ([https://support.illumina.com/content/dam/illumina-  
111 support/documents/documentation/chemistry\\_documentation/16s/16s-metagenomic-  
112 library-prep-guide-15044223-b.pdf](https://support.illumina.com/content/dam/illumina-support/documents/documentation/chemistry_documentation/16s/16s-metagenomic-library-prep-guide-15044223-b.pdf)). Amplicons were sequenced using MiSeq  
113 sequencing system and MiSeq V3 (2 × 300 bp) reagent kits (Illumina, San Diego, CA).

114 Paired-end 16S rDNA amplicon sequences were merged using VSEARCH with  
115 the “-M 1000” option [34]. Merged reads containing ambiguous nucleotides (i.e., “N”)  
116 were discarded. The remaining merged reads were clustered using VSEARCH to form

117 operational taxonomic units (OTUs) at a 99% sequence identity threshold. Singleton  
118 OTUs were discarded. The representative sequences of the remaining OTUs were  
119 searched against the SILVA ribosomal RNA gene database (release 138) [35] to  
120 taxonomically annotate OTUs using SINA [36] at a 99% sequence identity threshold.  
121 Abundant OTUs were defined as OTUs exceeding 1 % relative abundance by assuming  
122 the reported minimum host cell density for effective viral infection ( $\cong 10^4$  cells/ml) [37]  
123 and typical coastal marine prokaryotic cell density ( $\cong 10^6$  cells/ml) [38].

124 To identify statistically relevant variants within abundant OTUs, we applied  
125 minimum entropy decomposition (MED) [11] as previously reported [7]. All the  
126 sequences from each 99% OTU were aligned using MAFFT v7.123b (-retree 1 -  
127 maxiterate 0 -nofft -parttree) [39]. The alignment of sequences containing positions with  
128 entropy of  $>0.25$  position was decomposed, and decomposition continued until all  
129 positions had entropy of  $<0.25$ . The minimum number of the most abundant sequence  
130 within each amplicon sequence variant (ASV) needed to exceed 50 and ASVs that did  
131 not exceed 1% of the parent OTU composition were discarded [7].

### 132 **Virome sequencing, assembly, classification, and calculation of relative abundance**

133 The filtrate containing viruses was concentrated via  $\text{FeCl}_3$  precipitation [40] and  
134 purified using DNase and a CsCl density centrifugation step [41]. The DNA was then



135 extracted as previously described [42]. We failed to obtain enough amount of DNA for  
136 virome sequencing for one sample (February 2016), the sample was removed from the  
137 analysis. Libraries were prepared using a Nextera XT DNA sample preparation kit  
138 (Illumina, San Diego, CA) according to the manufacturer's protocol, using 0.25 ng viral  
139 DNA. Samples were sequenced using a MiSeq sequencing system and MiSeq V3 (2 ×  
140 300 bp) reagent kits (Illumina, San Diego, CA).

141 Viromes were individually assembled using SPAdes 3.9.1 with default *k*-mer  
142 lengths [43]. Additionally, we used scaffolds of these assemblies (hereafter referred to as  
143 contigs for simplicity). Circular contigs were determined as previously described [44].  
144 Contig sequences were clustered at 95% global average nucleotide identity with cd-hit-  
145 est (options: -c 0.95 -G 1 -n 10 -mask NX, 549 redundant contigs were discarded) [45].  
146 A total of 5 226 mts-OBV contigs (monthly time series Osaka Bay viral contigs, >10 kb,  
147 62 – 926 contigs/samples, including 202 circular ones) were obtained. Genome  
148 completeness and quality of mts-OBV contigs were evaluated using checkV (v0.7.0) [46]

149 In addition, this assembly generated 181 131 short contigs (i.e., from 1 kb up to  
150 10 kb). The abundance of these contigs was assessed based on the relative abundance of  
151 terminase large subunit genes (*terL*) as previously described [32]. In total, 4 666 genes  
152 were detected as putative *terL* genes (i.e., genes with the best hit to PF03354.14,

153 PF04466.12, PF03237.14, and PF05876.11). Fragments per kilobase per mapped million  
154 reads (FPKM) for putative *terL* genes were calculated using in-house ruby scripts.

155           The mts-OBV contigs with complete viral genomic sequence set collected in a  
156 previous study [44] were used for viral abundance estimation based on read mapping. The  
157 complete viral genomic sequence belonged to one of the following two categories: (i) 1  
158 811 environmental viral genomes (EVGs; all are circularly assembled genomes, 45 were  
159 assembled in Osaka Bay in a previous study [44]) derived from marine virome studies;  
160 (ii) 2 429 reference viral genomes (RVGs) of cultured dsDNA viruses. Genus-level  
161 genomic OTUs (gOTUs) were previously assigned for complete genomes based on  
162 genomic similarity score ( $S_G$ ) using ViPTree [47]. For the mts-OBV contigs, if a sequence  
163 showed a high similarity to one of the complete genomes (with  $S_G > 0.15$ ), the sequence  
164 was assigned to the gOTU of the most similar genome as previously described [32, 44].  
165 Quality controlled virome reads were obtained through quality control steps as previously  
166 described [44]. These reads were mapped against the viral genomic sequence set using  
167 Bowtie2 software with the “--score-min L,0,-0.3” parameter [48]. FPKM values were  
168 calculated using in-house ruby scripts.

## 169 **Viral host prediction**

170 First, we assigned putative host groups based on the genomic similarity with  
171 viral genomic sequence set collected in a previous study [44]. If mts-OBV contigs were  
172 classified into the same gOTU with the viruses with a known (via cultivation) or predicted  
173 (by genomic content [44]) host group, the host group was assigned to the contigs. We also  
174 compared similarity with mts-OBV contigs, the viral genomes deposited in a virus-host  
175 database (as of October 2018), and recently reported isolates [49, 50].

176 In addition, for the viruses without assigned host groups via genomic similarity,  
177 we performed *in silico* host prediction based on the nucleotide sequence similarity  
178 between viruses and prokaryotes as previously described [30, 51, 52]. First, a total of 220  
179 103 viral genomes/contigs derived from marine viromes were collected and used for the  
180 analysis [24, 44, 53–55] (**Supplementary Table 1**). For the putative host genomes, we  
181 collected a total of 8 016 MAGs/SAGs from marine metagenomic or single cell genomic  
182 studies [56–60]. From Pachiadaki *et al*, we only used 1 040 high quality SAG assemblies  
183 with  $\geq 80\%$  completion [60]. To remove the contamination of virus-like contigs from the  
184 MAGs/SAGs, 14 967 contigs classified as viral-like sequences using VirSorter (category  
185 1, 2, and 3) [61] were discarded (**Supplementary Table 1**). Details of each prediction  
186 method were reviewed previously [29].

187 *CRISPR-spacer matching*

188 CRISPR-spacer sequences were predicted using the CRISPR Recognition Tool  
189 [62], and then a total of 13 305 sequences were extracted. Detected spacer sequences and  
190 spacer sequences deposited in CIRSPRdb [63] were queried against viral genomes using  
191 the BLASTn-short function [64] with the following parameters: At least 95% identity  
192 over the whole spacer length and only 1–2 SNPs at the 5'-end of the sequence was allowed.

### 193 *tRNA matching*

194 tRNAs were recovered from MAGs/SAGs and viral genomes using ARAGORN  
195 with the '-t' option [65]. A total of 213 939 and 31 439 tRNAs were recovered from  
196 MAGs/SAGs and viral genomes, respectively. The recovered prokaryotic and viral  
197 tRNAs with 111 385 tRNAs deposited in GtRNAdb [66] were compared using BLASTn  
198 [64] and only a perfect match (100% length and 100% sequence identity) was considered  
199 as indicative of putative host-virus pairs.

### 200 *Nucleotide sequence homology of prokaryotic and viral genomes*

201 Viral genomes/contigs were queried against prokaryotic MAGs/SAGs and  
202 prokaryotic genomes in NCBI RefSeq (as of December 2019) using BLASTn [64]. Only  
203 the best hits above 80% of identity across alignment with a length of  $\geq 1500$  bp were  
204 considered as indicative of host-virus pairs. For the prediction based on MAG/SAGs

205 contigs, we performed taxonomic validation of the matching contigs in MAG/SAGs as  
206 previously described [30]. Viruses belonging to the same gOTU were assigned consistent  
207 host groups according to a previous study [44], with three exceptional gOTUs (G404,  
208 G405, and G495), which annotated multiple host lineages. For the contigs assigned to the  
209 three gOTUs, genomic similarity among the same gOTU members were calculated and  
210 the potential host of each contig was assigned based on the most similar genomes/contigs  
211 which was annotated via host prediction

## 212 **Statistical analyses**

213 Before statistical analyses, 16S rRNA amplicon reads were rarefied using the  
214 “vegan” package in R (20 803 reads per sample, based on minimum sample size) [67].  
215 To examine within-sample alpha-diversity (Shannon diversity, evenness, and richness)  
216 and beta-diversity (Bray-Curtis similarity: 1 - Bray-Curtis dissimilarity, for all of the  
217 possible pairwise combinations among all of the sampling points), we used the vegan  
218 package in R [68]. Mantel tests were performed using R and the vegan package [68] only  
219 on fully overlapping sets of data. Pairwise correlations between estimated abundance of  
220 prokaryotic ASVs and viral contigs (having putative host information and exceeding  
221 FPKM >10 at least a month, 2 735 contigs ) on fully overlapping sets of data were then  
222 determined via Spearman correlation ( $P < 0.01$ ,  $Q < 0.05$ ) as implemented in the local

223 similarity analysis program. [69, 70]. Network visualizations of correlation matrices were  
224 generated using Cytoscape\_v3.8.0 [71].

### 225 **Estimation of the growth strategy of ASVs**

226 We established indexes for the approximation of the  $r$  (intrinsic rate of natural  
227 increase) and  $K$  (carrying capacity) of each ASV by monitoring their monthly dynamics.  
228 For the approximation of the  $r$  of each ASV, the maximum increase of the normalized  
229 relative rank (0-1) per month was applied. Similarly, for the approximation of  $K$  for each  
230 ASV, the length of continuously dominant month ( $>0.1\%$  relative abundance, 1-18  
231 months) of each ASV was applied.

### 232 **Detection of SNPs**

233 Reads were mapped to the viral contigs using Bowtie2 with a “--score-min L,0,-  
234 0.3” [48] and the resulting alignment files were converted to BAM format and sorted  
235 using samtools [72]. The average genome entropy of the contigs which exceeded more  
236 than 10 coverage each month was computed using the DiversiTools  
237 (<http://josephhughes.github.io/DiversiTools/>).

### 238 **Data availability**

239 Sequences obtained from the observations were deposited at the DNA Data Bank  
240 of Japan (DDBJ) under project number PRJDB10879. Raw sequence reads can be found  
241 under accession numbers DRX260081 to DRX260115 and assemblies of viromes can be  
242 found under BioSample SAMD00279559.

## 243 **Results and discussion**

### 244 **Overview of prokaryotic and viral communities in Osaka Bay**

245 We obtained 2.8 M paired-end reads (24 168 to 846 565 reads per sample) from  
246 the 16S rRNA gene V3-V4 region amplicon sequencing libraries derived from 18  
247 collected samples and these sequences were clustered into 35 191 OTUs (1 462 to 18 268  
248 OTUs per month) with a sequence identity threshold of 99% (species-level populations,  
249 **Supplementary Table S2**). The prokaryotic community was dominated by  $\alpha$ -  
250 Proteobacteria (41%),  $\gamma$ -Proteobacteria (21%), Bacteroidetes (19%), and Cyanobacteria  
251 (7%) at the phylum level (class level for Proteobacteria).

252 To explore viral community composition, we obtained 60 M paired-end reads of  
253 viromes (929 884 to 8 124 354 sequences per sample), which were generated from the  
254 virus size fraction of 17 samples that were concomitantly collected with the prokaryotic  
255 size fractions (**Supplementary Table S2**). After decontamination of prokaryotic  
256 sequences, 5 226 virus-like large contigs (> 10 kb, monthly time series Osaka Bay viral

257 contigs: mts-OBV contigs) were obtained, including 202 circularly assembled viral  
258 genomes (**Supplementary Table S2**). In this study, we refer to these contigs  
259 operationally as species-level viral populations, according to the previous proposal in  
260 viral ecology [73]. The majority (~75%) of mts-OBV contigs showed high genomic  
261 similarity (genomic similarity score;  $S_G > 0.15$ ; see [44] for the definition of  $S_G$ ) with one  
262 of the previously reported viral complete genomes [44] and the 202 circular genomes  
263 assembled in this study. Based on the  $S_G$ , these mts-OBV contigs were classified into 314  
264 gOTUs (**Supplementary Table 2**). On average, 40% of virome reads (29 to 53% per  
265 sample) were mapped on the mts-OBV contigs or previously reported viral genomes [44].  
266 The mts-OBV contigs occupied 96% relative abundance on average for individual  
267 samples (based on the FPKM values calculated from read counts). Relative abundance of  
268 terminase large subunit genes (*terL*) of the whole set of contigs (>1 kb) indicates that all  
269 mts-OBV contigs (>10 kb) were ranked at the top (>30%) of the whole community in at  
270 least one sample (the lowest of maximum relative abundance was 0.0115%,  
271 16Jan\_NODE\_472, **Supplementary Figure S1**).

272         Alpha-diversity (Shannon index) of the viral community was significantly higher  
273 than that of the prokaryotic community ( $p < 0.001$ , **Supplementary Figures S2A-B**).  
274 Both richness and evenness were also significantly higher in the viral community than in



275 the prokaryotic community (**Supplementary Figure S2C-F**,  $p < 0.001$ ). It should be  
276 noted that prokaryotic diversity was evaluated via single marker gene analysis (i.e., 16S  
277 rRNA) but viral diversity was evaluated via whole genome sequencing. Thus, the  
278 methodological difference could have caused the relatively higher diversity of the viral  
279 community. Another possible explanation for the higher viral diversity is that a  
280 prokaryotic species can be infected by more than one viral species at each time point  
281 (discussed below).

## 282 **Seasonal dynamics of prokaryotic and viral communities**

283 We investigated seasonal dynamics of prokaryotic and viral communities using  
284 the Bray-Curtis similarity index between all possible pairs of samples (136 pairs, 1- to  
285 17-month intervals). Both prokaryotic and viral communities showed clear seasonal  
286 patterns, with a peak of average similarity at an interval of about 12 months, representing  
287 the same seasons, and the bottom of average similarity at an interval of 6 months,  
288 representing opposite seasons (**Figure 1**). Prokaryotic community dynamics were  
289 concordant with seasonal environmental variables, such as water temperature and  
290 inorganic nutrients, which increased in summer (June to September) presumably because  
291 of the increasing river inflow during the rainy season (**Supplementary Table S3**,  
292 **Supplementary Figure S3**). The similarity between samples was systematically lower

293 for the viral community than that for the prokaryotic community (**Figure 1**, discussed  
294 below). The viral community composition was significantly correlated with the  
295 prokaryotic community composition, as well as the seasonal environmental variables  
296 (Mantel  $\rho = 0.504$ ,  $p < 0.01$ , **Supplementally Table S3** ).

297           Given that each virus can only propagate in its specific host, and thereby the viral  
298 community composition is shaped by prokaryotic community composition, abundance of  
299 each virus might reflect the abundance of its host. To test this hypothesis, compositions  
300 of prokaryotic and viral communities were compared using the information of predicted  
301 viral hosts (mostly host phylum- or class level composition). Putative host groups of  
302 viruses were predicted using four commonly used genome-based *in silico* prediction  
303 methods (similarity with known viruses, CRISPR-spacer match, tRNA match, and  
304 genome homology). First, based on the similarity with cultured viruses, putative host  
305 groups of 951 mts-OBV contigs (22 gOTUs) were predicted  
306 (*Synechococcus/Prochlorococcus*, 182 contigs; SAR11, 501 contigs; SAR116, 214  
307 contigs; *Roseobacter*, 31 contigs; others, 23 contigs, **Supplementally Table S4**).  
308 Similarly, putative host groups of 504 mts-OBV contigs (39 gOTUs) were predicted  
309 based on the similarity with uncultured viral genomes considering previous assignment  
310 of putative hosts (Bacteroidetes, 468 contigs; MGII, 36 contigs [30, 44], **Supplementally**

311 **Table S4**). For other 1 460 mts-OBV contigs ( $\alpha$ -Proteobacteria, 35 gOTUs, 621 contigs;  
312 Bacteroidetes, 80 contigs;  $\gamma$ -Proteobacteria, 236 contigs;  $\delta$ -Proteobacteria 326 contigs;  
313 others, 53 contigs, **Supplementally Table S4-5**), putative host groups were predicted via  
314 the sequence similarity (i.e. CRISPR-spacer matching, tRNA matching, and genome  
315 homology) between viral (mts-OBVs with previously reported >200,000 marine viral  
316 genomes [24, 44, 53–55]) and prokaryotic genomic data sets (>8 000 marine prokaryotic  
317 metagenome-assembled genomes in previous studies [56–60] and the genomes in the  
318 NCBI RefSeq database). Altogether, we assigned potential host groups for 2 844 mts-  
319 OBV contigs ( $\alpha$ -Proteobacteria, 1 375 contigs; Bacteroidetes, 548 contigs;  $\delta$ -  
320 Proteobacteria, 326 contigs;  $\gamma$ -Proteobacteria, 250 contigs; Cyanobacteria 190 contigs,  
321 **Supplementally Table 4**).

322 Major phyla (or classes for Proteobacteria) in the prokaryotic community did not  
323 change drastically but the relative abundance of several phyla (classes) exhibited  
324 remarkable seasonal dynamics (**Figure 2**). The seasonal dynamics of the predicted viral  
325 hosts resembled the seasonal dynamics of prokaryotes (**Figure 2**). For example,  
326 Cyanobacteria (79% of reads were assigned to OTU\_8, *Synechococcus*) dominated in  
327 summer (up to 9.6% and 22.6% of the community in June 2015 and July 2016,  
328 respectively, **Figure 2**) and *Synechococcus* virus abundance also increased in summer (up

329 to 5.3 and 12.1% of the community in August 2015 and August 2016, respectively,  
330 **Figure 2**). Similarly, the relative abundance of Bacteroidetes increased from winter to  
331 spring (up to 33.7% of the community in May 2016, **Figure 2**) and Bacteroidetes virus  
332 abundance also increased during spring (up to 30.2% of the community in May 2016,  
333 **Figure 2**). Relative abundances of both SAR11 (from 5 to 47% of the community, **Figure**  
334 **2**) and SAR11 viruses (from 9 to 22% of the community, **Figure 2**) showed changes over  
335 time but they were always abundant throughout the observed period. Therefore, virally  
336 community appear to generally follow the dynamics of their host.

337 However, viral abundance did not always match with their putative host  
338 abundance (**Supplementally Figure S4**). For example, the proportion of putative  $\gamma$ -  
339 Proteobacteria viruses was lower compared with that of  $\gamma$ -Proteobacteria and the  
340 proportion of putative  $\delta$ -Proteobacteria viruses was much higher compared with that of  
341  $\delta$ -Proteobacteria (**Figure 2**). The lack of a tight correlation between viral and host  
342 abundance may not be surprising. The host prediction based on genome analysis in this  
343 study was mostly at the phylum or class level except for contigs showing similarity with  
344 cultured viruses, such as *Synechococcus/Prochlorococcus* cyanoviruses, while typical  
345 prokaryotic viruses could only infect specific host species or strains. Further, although  
346 our analysis annotated putative hosts at nearly 60% of the viral community, remaining

347 populations without host prediction may lead to the underestimation of viruses infecting  
348 some taxa. The difference in burst sizes among viruses, which have been estimated to  
349 range from 6 to 300 in the marine environment [74], can also influence the estimation of  
350 viral abundance. Next, to investigate whether viral abundance increased according to  
351 specific host abundance, we statistically examined associations (i.e. co-occurrence)  
352 between the viruses and ASVs extracted from the abundant 73 prokaryotic OTUs .

### 353 **Co-occurrence network analysis between the abundant prokaryotes and viruses**

354 To examine the dynamics of closely related (nearly strain-level) variants within  
355 each OTU, 114 ASVs (1~4 ASVs per OTU, **Supplementally Figure S5**) were extracted  
356 from the abundant 74 OTUs via minimum entropy decomposition [7, 10, 11]. Then,  
357 pairwise correlations (co-occurrence network) between the 114 prokaryotic ASVs and the  
358 viral species, which were predicted to infect the prokaryotic ASVs via host prediction  
359 (e.g. 37 Bacteroidetes ASVs and 548 mts-OBV contigs predicted as Bacteroidetes virus),  
360 were determined via Spearman's correlations. In total, 6 423 significant correlations  
361 between 104 prokaryotic ASVs and 1 366 viral species were detected (**Figure 3**,  
362 **Supplementary Figure S6**). The majority (88.6%) of prokaryotic ASVs correlated with  
363 at least one viral species. In contrast, only 34% and 31% of prokaryotic ASVs positively  
364 and negatively correlated with environmental variables, respectively (Spearman

365 correlations ( $r > |0.6|$ ,  $P < 0.01$ ,  $Q < 0.05$ , **Supplementary Table S6**). The number of co-  
366 occurring viral species ranged from 0 (13 ASVs) to 359 (ASV6-1, classified into  
367 *Planktomarina*) and the median value was 16.

368         Using the detected 6 423 putative virus-host pairs, we examined whether the  
369 viruses were abundant when their putative host was abundant. First, four cyanobacterial  
370 ASVs and co-occurring 130 cyanovirus species were examined. Since substantial  
371 numbers of *Synechococcus/Prochlorococcus*-virus pairs have been reported in culture-  
372 based studies [75–78], host prediction for cyanoviruses is likely to be reliable. These  
373 cyanoviral species were more dominated in the viral community when their co-occurring  
374 ASVs exceeded predicted minimum host cell density for effective propagation of  
375 prokaryotic viruses ( $10^3$  cells/ml [79] or  $10^4$  cells/ml [37], **Figure 4, Supplementary**  
376 **Figure S7, S8**). Thus, cyanobacterial viral species were not abundant or often  
377 undetectable when their putative hosts were less abundant, but they became dominant  
378 when putative host abundance increased. This viral increase with host abundance was  
379 also observed in 98 other prokaryotic ASVs and their co-occurring viral species (**Figure**  
380 **4, Supplementary Figure S7, S8**). This result clearly indicates that frequency-dependent  
381 viral infection is prevalent in abundant prokaryotes at least between the detected virus-

382 host pairs.

### 383 **Characterization of the virus-host interaction by host taxa**

384           The community of viruses showed a higher alpha-diversity than the community  
385 of prokaryotes (**Supplementary Figure S2**), and the co-occurrence analysis indicated  
386 one-to-many associations between the host and viral populations (median 16 viral species  
387 per a prokaryotic ASV). This suggests that one abundant prokaryotic ASV can interact  
388 with multiple viral species. Note that the numbers of co-occurring viral species were  
389 overestimated since each contig could be a partial genome fragment derived from the  
390 same viral genome (average completeness of mts-OBV contigs was 39%,  
391 **Supplementary Table S4**). However, the contigs classified into different genera (average  
392 8 gOTUs) often co-occurred with an ASV. Next, we characterized the “one to many”  
393 virus-host interaction network (i.e. how many viruses co-occurred with each ASV) with  
394 respect to their host taxa and host growth strategy.

395           The number of co-occurring viral species for prokaryotic ASVs was generally  
396 dependent on the predicted number of their viruses determined via host prediction  
397 (**Supplementary Figure S9**). For example, Bacteroidetes viruses (548 viruses) were the  
398 second most frequently observed ones and an average of 71.5 viruses co-occurred with  
399 Bacteroidetes ASVs (1–208 viruses per ASV, between 37 Bacteroidetes ASVs and 339

400 Bacteroidetes viruses). The number of co-occurring viruses could be overestimated  
401 because of the double count of co-occurring viruses between two co-occurring ASVs (if  
402 ASV-A and ASV-B co-occurred, the viruses co-occurring with ASV-A also can be  
403 included in the viruses co-occurring with ASV-B and vice versa. In fact, up to 16 ASV-  
404 ASV co-occurring pairs were detected for Bacteroidetes). In contrast, the taxa with less  
405 frequently detected viruses (e.g. MGII, 38 viruses) had a smaller number of co-occurring  
406 populations (0–3 viruses per ASV, **Supplementary Figure S9**). Thus, the number of co-  
407 occurring viral species might be underestimated in these taxa because of host prediction  
408 limitations. Exceptionally, SAR11 had relatively few co-occurring viral species even  
409 though there were more than 500 putative SAR11 viral species (**Supplementary Figure**  
410 **S9**). SAR11 is often regarded as a *K*-strategist, which is believed to be resistant to viral  
411 infection [4], and the growth strategy may influence the co-occurrence dynamics with  
412 viruses. Next, we examined the number of co-occurring viruses among prokaryotic ASVs  
413 classified in the same taxa depending on the growth strategy to solve this issue.

#### 414 **Characterization of the virus-host interaction by host growth strategy**

415 The growth strategy (*r* or *K*) of each prokaryotic ASV was defined by the indexes that we  
416 introduced (see methods). According to these, 13 ASVs were determined as *K*-strategist-  
417 like ASVs (i.e.  $K\text{-index} > 12$ ,  $r\text{-index} < 0.1$ ). Among the 13 ASVs, seven were classified



418 into SAR11 (**Supplementally Figure S10**). Twenty two of 57 ASVs belonging to the  
419 taxa previously predicted as *r*-strategist (i.e. *Flavobacteriaceae*, *Rhodobacteraceae*,  
420 *Vibrio*, and Marine Group II) were classified into the *r*-strategist-like ASVs ( $K$ -index $<3$ ,  
421  $r$ -index $>0.5$ , total 33 ASVs) (**Supplementally Figure S10**). Generally, *r*-strategist-like  
422 ASVs, such as members of Bacteroidetes, showed a large number of co-occurring viral  
423 species (**Supplementally Figure S10**). In contrast, *K*-strategist-like ASVs of  
424 *Synechococcus* and SAR11 showed relatively few co-occurring viral species  
425 (**Supplementally Figure S10**). The most abundant ASV of *Synechococcus* (ASV8-1,  
426 making up 76.7% of the whole cyanobacterial reads) and SAR11 (ASV1-1, occupied 7-  
427 64% of whole SAR11 reads of each month) showed 7 and 16 co-occurring viruses,  
428 respectively, even though 183 cyanoviruses and 500 SAR11 viruses were detected during  
429 the observation (**Supplementally Figure S10**).

430         If a temporal switch of virus-host pairs occurred, co-occurrence analysis may fail  
431 to detect virus-host associations.. Therefore, we compared dynamics of the two dominant  
432 prokaryotic ASVs and viral species that did not co-occur with their predicted hosts.  
433 Representative sequence of ASV8-1 matched with the members of *Synechococcus*  
434 subcluster 5.1a at 100% of identity. Among the 53 cyanoviral species that did not co-  
435 occur with any cyanobacterial ASV, 41 species were classified into two gOTUs (G14,

436 T7-like cyanosiphovirus, and G386, T4-like cyanomyovirus), which are known to infect  
437 subcluster 5.1a (e.g. *Synechococcus* sp. WH 8103, clade II), suggesting plausible  
438 interaction between ASV8-1 and these viruses. ASV8-1 especially dominated during  
439 summer (maximum 8% and 21% of prokaryotic community in June 2015 and July 2016,  
440 respectively, **Figure 5A**). Of these 53 viral species, abundances of which also increased  
441 in summer, four were only abundant in 2015 (from five to > 170 times abundant in 2015  
442 than 2016) and other 38 species were more abundant in 2016 (from five to >300 times  
443 more abundant in 2016 than 2015) (**Figure 5A**). Similarly, ASV1-1 of SAR11 was always  
444 abundant (**Figure 5B**) and SAR11 viruses occupied a major fraction of the viral  
445 community. However, abundant members of SAR11 viruses (309 contigs) were replaced  
446 in a relatively short time (a few months) (**Figure 5B**). These results suggest that the host-  
447 virus interaction might have been underestimated in the co-occurrence analysis and *K*-  
448 strategists also interact with multiple viruses based on their cell density.

449 Finally, we investigated whether the observed viruses, including those not  
450 statistically detected as co-occurring viruses with hosts (e.g., 53 cyanoviruses and 309  
451 SAR11 viruses in Figure 5), were also produced via increased contact frequency with  
452 hosts. To infer the contact frequency, we focused on single-nucleotide polymorphisms  
453 (SNPs) in viral genomes. SNPs of closely related viral populations were previously

454 observed in abundant viral populations, such as freshwater cyanoviruses [80] and marine  
455 viruses in other coastal areas [24]. Since a recent study suggested that the majority of  
456 viruses observed in the virome were produced via diel and local viral-host interactions  
457 [32], it likely indicates that multiple infection events may lead to the generation of  
458 mutations through DNA replications. We thus hypothesized a frequent reproduction and  
459 mutations for abundant viruses with an increased contact frequency with their hosts.  
460 Therefore, SNPs from mts-OBV contigs with more than ten coverages (2 356 contigs)  
461 were calculated. We observed an increase of intrapopulation genetic diversity (SNPs  
462 quantified by average genomic entropy) as a function of overall population abundance  
463 regardless of their host taxa (**Supplementary Figure S11**). This result corroborates the  
464 notion that contact-rate is the key parameter for the viral reproduction regardless of  
465 whether they show a long term co-occurrence pattern with their hosts.

#### 466 **Ecological interpretation inferred from virus-host dynamics**

467         There are at least three possible mechanisms of the above-mentioned virus-host  
468 pair switch (**Figure 5**). First, more closely related prokaryotic populations that cannot be  
469 differentiated by the 16S rRNA gene polymorphism could co-occur with viruses.  
470 Previous studies focusing on the polymorphism of ITS sequences (ITS-ASV) in SAR11  
471 and Cyanobacteria reported that ITS-ASV dynamics correlate more with viral dynamics,

472 inferred from T4-like viral marker genes, than 16S-ASV dynamics of these taxa [7, 27].  
473 Therefore, dynamics of more highly resolved populations (e.g. ITS-ASVs or whole  
474 genome sequence based-populations) might have synchronized with observed viral  
475 dynamics. Second, the temporal acquisition of host resistance or viral counter-resistance  
476 as often observed in culture model systems [83] may cause a switch of the dominant viral  
477 species. Third, it can be interpreted as a result of the founder effect, following host  
478 fluctuation via genetic drift [81]. Seasonal fluctuating of host population cause bottleneck  
479 effect, and therefore, the founder effect following the bottleneck effect enables the  
480 abundance of several viral species to equally increase. This was suggested as a  
481 mechanism of an incomplete selective sweep in the freshwater Cyanobacteria populations  
482 having different CRISPR-spacer genotypes [82]. The scenario is more plausible between  
483 ASV8-1 and their viruses because ASV8-1 experienced clear seasonal fluctuation  
484 (**Figure 5A**).

485         Altogether, we revealed that the frequency-dependent infection occurred in  
486 abundant prokaryotic populations according to the cell density via “one to many” host-  
487 virus correspondences regardless of the host growth strategy. One to many host-virus  
488 correspondences may suggest a prokaryotic species attacked by multiple viruses having  
489 a different infection strategy (e.g. different cell surface targets). This can cause difficulties

490 in establish complete resistance toward multiple co-existing viruses and sustain  
491 continuous virus-host interaction in the environment. The difficulty of the emergence of  
492 “virus-free” species may be a potential mechanism for the prevailed frequency-dependent  
493 selection of abundant marine prokaryotes.

## 494 **Conclusion**

495         Comparison of monthly dynamics between prokaryotic and viral communities  
496 indicated concurrent seasonal shifts at the whole community level. Concurrent seasonal  
497 shifts were also broadly observed between the corresponding virus and host pairs at the  
498 phylum or class level based on the host prediction analysis. We further statistically  
499 confirmed their co-occurrence via network analysis among abundant prokaryotic  
500 populations and their viruses regardless of the host taxa or growth strategies. These results  
501 suggested that abundant prokaryotes were exposed to frequent viral infection regardless  
502 of their taxa or growth strategy. It indicates that lysis of the abundant prokaryotes via viral  
503 infection have a considerable contribution to the biogeochemical cycling and  
504 maintenance of prokaryotic community diversity. Further, these abundant prokaryotic  
505 populations should reflect actively growing members of the community since they  
506 became dominant even though they suffered frequent loss by viral lysis.

507

## 508 **Acknowledgments**

509           KT would like to thank Ryoma Kamikawa, Shigeki Sawayama, and Daichi  
510 Morimoto at the Kyoto University for technical comments and preparation of this  
511 manuscript. KT would also like to thank Hisashi Endo, Florian Proding, Hiroaki Takebe,  
512 Kentaro Fujiwara, and Tatsuhiro Isozaki at Kyoto University and Keizo Nagasaki at  
513 Kochi University for useful discussions. Computational work was supported by the Super  
514 Computer System, Institute for Chemical Research, Kyoto University. This study was  
515 supported by Grants-in Aids for Scientific Research KAKENHI (No. 17H03850 and No.  
516 21H05057), and Challenging Exploratory Research (No. 26660171) from the Japan  
517 Society for the Promotion of Science (JSPS), Canon Foundation (No. 203143100025),  
518 JSPS Scientific Research on Innovative Areas (No. 16H06437), and the Bilateral Open  
519 Partnership Joint Research Project (Japan-Lithuania Research Cooperative Program)  
520 “Research on prediction of environmental change in Baltic Sea based on comprehensive  
521 metagenomic analysis of microbial viruses”.

522

## 523 **Conflict of interest**

524 The authors declare that the research was conducted in the absence of any commercial  
525 or financial relationships that could be constructed as a potential conflict of interest.

526

## 527 **References**

- 528 1. Falkowski PG, Fenchel T, Delong EF. The microbial engines that drive Earth's  
529 biogeochemical cycles. *Science* 2008; **320**: 1034–9.
- 530 2. Sunagawa S, Coelho LP, Chaffron S, Kultima JR, Labadie K, Salazar G, et al.  
531 Structure and function of the global ocean microbiome. *Science* 2015; **348**:  
532 1261359.
- 533 3. Pommier T, Canbäck B, ... LR-M, 2007 U. Global patterns of diversity and  
534 community structure in marine bacterioplankton. *Molecular Ecology* 2006; **16**:  
535 867–880.
- 536 4. Suttle CA. Marine viruses - major players in the global ecosystem. *Nature reviews*  
537 *Microbiology* 2007; **5**: 801–812.
- 538 5. Teeling H, Fuchs BM, Becher D, Klockow C, Gardebrecht A, Bennke CM, et al.  
539 Substrate-Controlled Succession of Marine Bacterioplankton Populations Induced  
540 by a Phytoplankton Bloom. *Science* 2012; **336**: 608–611.
- 541 6. Needham DM, Fuhrman JA, Cram JA, Fuhrman JA, Sun F. Pronounced daily  
542 succession of phytoplankton, archaea and bacteria following a spring bloom.  
543 *Nature Microbiology* 2016; **1**: 16005.
- 544 7. Needham DM, Sachdeva R, Fuhrman JA. Ecological dynamics and co-occurrence  
545 among marine phytoplankton, bacteria and myoviruses shows microdiversity  
546 matters. *The ISME Journal* 2017; **11**: 1614–1629.
- 547 8. Chafee M, Fernández-Guerra A, Buttigieg PL, Gerds G, Eren AM, Teeling H, et  
548 al. Recurrent patterns of microdiversity in a temperate coastal marine environment.  
549 *ISME Journal* 2018; **12**: 237–252.
- 550 9. Tikhonov M, Leach RW, Wingreen NS. Interpreting 16S metagenomic data  
551 without clustering to achieve sub-OTU resolution. *ISME Journal* 2015; **9**: 68–80.
- 552 10. Eren AM, Maignien L, Sul WJ, Murphy LG, Grim SL, Morrison HG, et al.  
553 Oligotyping: Differentiating between closely related microbial taxa using 16S  
554 rRNA gene data. *Methods in Ecology and Evolution* 2013; **4**: 1111–1119.
- 555 11. Eren AM, Morrison HG, Lescault PJ, Reveillaud J, Vineis JH, Sogin ML.  
556 Minimum entropy decomposition: Unsupervised oligotyping for sensitive  
557 partitioning of high-throughput marker gene sequences. *ISME Journal* 2015; **9**:  
558 968–979.
- 559 12. Suttle CA. Viruses in the sea. *Nature* 2005; **437**: 356–361.

- 560 13. Breitbart M, Bonnain C, Malki K, Sawaya NA. Phage puppet masters of the  
561 marine microbial realm. *Nature Microbiology* 2018; **3**: 754–766.
- 562 14. Fuhrman J, Suttle C. Viruses in Marine Planktonic Systems. *Oceanography* 1993;  
563 **6**: 51–63.
- 564 15. Winter C, Bouvier T, Weinbauer MG, Thingstad TF. Trade-Offs between  
565 Competition and Defense Specialists among Unicellular Planktonic Organisms: the  
566 “Killing the Winner” Hypothesis Revisited. *Microbiology and Molecular Biology*  
567 *Reviews* 2010; **74**: 42–57.
- 568 16. Rodriguez-Valera F, Martin-Cuadrado A-B, Rodriguez-Brito B, Pasić L, Thingstad  
569 TF, Rohwer F, et al. Explaining microbial population genomics through phage  
570 predation. *Nature reviews Microbiology* 2009; **7**: 828–36.
- 571 17. Thingstad TF. Elements of a theory for the mechanisms controlling abundance,  
572 diversity, and biogeochemical role of lytic bacterial viruses in aquatic systems.  
573 *Limnology and Oceanography* 2000; **45**: 1320–1328.
- 574 18. Våge S, Storesund JE, Thingstad TF. Adding a cost of resistance description  
575 extends the ability of virus-host model to explain observed patterns in structure  
576 and function of pelagic microbial communities. *Environmental Microbiology*  
577 2013; **15**: 1842–1852.
- 578 19. Zhao Y, Temperton B, Thrash JC, Schwalbach MS, Vergin KL, Landry ZC, et al.  
579 Abundant SAR11 viruses in the ocean. *Nature* 2013; **494**: 357–360.
- 580 20. Fuhrman JA, Cram JA, Needham DM. Marine microbial community dynamics and  
581 their ecological interpretation. *Nature Reviews Microbiology* 2015; **13**: 133–146.
- 582 21. Bunse C, Pinhassi J. Marine Bacterioplankton Seasonal Succession Dynamics.  
583 *Trends in Microbiology* 2017; **25**: 494–505.
- 584 22. Pagarete A, Chow C-ET, Johannessen T, Fuhrman JA, Thingstad TF, Sandaa RA.  
585 Strong seasonality and interannual recurrence in marine myovirus communities.  
586 *Applied and environmental microbiology* 2013; **79**: 6253–9.
- 587 23. Chow CET, Fuhrman JA. Seasonality and monthly dynamics of marine myovirus  
588 communities. *Environmental Microbiology* 2012; **14**: 2171–2183.
- 589 24. Ignacio-Espinoza JC, Ahlgren NA, Fuhrman JA. Long-term stability and Red  
590 Queen-like strain dynamics in marine viruses. *Nature Microbiology* . 2020. *Nature*  
591 *Research* . , **5**: 265–271
- 592 25. Hwang J, Park SY, Park M, Lee S, Lee T-K. Seasonal Dynamics and  
593 Metagenomic Characterization of Marine Viruses in Goseong Bay, Korea. *PLOS*  
594 *ONE* 2017; **12**: e0169841.



- 595 26. Hevroni G, Flores-Uribe J, Béjà O, Philosof A. Seasonal and diel patterns of  
596 abundance and activity of viruses in the Red Sea. *Proceedings of the National*  
597 *Academy of Sciences of the United States of America* 2020; **117**: 29738–29747.
- 598 27. Ahlgren NA, Perelman JN, Yeh Y, Fuhrman JA. Multi-year dynamics of fine-scale  
599 marine cyanobacterial populations are more strongly explained by phage  
600 interactions than abiotic, bottom-up factors. *Environmental Microbiology* 2019;  
601 **21**: 2948–2963.
- 602 28. Brum JR, Sullivan MB. Rising to the challenge: accelerated pace of discovery  
603 transforms marine virology. *Nature Reviews Microbiology* 2015; **13**: 147–159.
- 604 29. Edwards RA, McNair K, Faust K, Raes J, Dutilh BE. Computational approaches to  
605 predict bacteriophage–host relationships. *FEMS Microbiology Reviews* 2016; **40**:  
606 258–272.
- 607 30. Tominaga K, Morimoto D, Nishimura Y, Ogata H, Yoshida T. In silico Prediction  
608 of Virus-Host Interactions for Marine Bacteroidetes With the Use of Metagenome-  
609 Assembled Genomes. *Frontiers in Microbiology* 2020; **11**: 738.
- 610 31. Takebe H, Tominaga K, Fujiwara K, Yamamoto K, Yoshida T. Differential  
611 Responses of a Coastal Prokaryotic Community to Phytoplanktonic Organic  
612 Matter Derived from Cellular Components and Exudates. *Microbes and*  
613 *Environments* 2020; **35**: n/a.
- 614 32. Yoshida T, Nishimura Y, Watai H, Haruki N, Morimoto D, Kaneko H, et al.  
615 Locality and diel cycling of viral production revealed by a 24 h time course cross-  
616 omics analysis in a coastal region of Japan. *ISME Journal* 2018; **12**: 1287–1295.
- 617 33. Takahashi S, Tomita J, Nishioka K, Hisada T, Nishijima M. Development of a  
618 prokaryotic universal primer for simultaneous analysis of Bacteria and Archaea  
619 using next-generation sequencing. *PLoS ONE* 2014; **9**: e105592.
- 620 34. Rognes T, Flouri T, Nichols B, Quince C, Mahé F. VSEARCH: a versatile open  
621 source tool for metagenomics. *PeerJ* 2016; **4**: e2584.
- 622 35. Quast C, Pruesse E, Yilmaz P, Gerken J, Schweer T, Yarza P, et al. The SILVA  
623 ribosomal RNA gene database project: Improved data processing and web-based  
624 tools. *Nucleic Acids Research* 2013; **41**: D590–D596.
- 625 36. Pruesse E, Peplies J, Glöckner FO. SINA: Accurate high-throughput multiple  
626 sequence alignment of ribosomal RNA genes. *Bioinformatics* 2012; **28**: 1823–  
627 1829.
- 628 37. Wiggins BA, Alexander M. Minimum bacterial density for bacteriophage  
629 replication: implications for significance of bacteriophages in natural ecosystems.  
630 *Applied and environmental microbiology* 1985; **49**: 19–23.

- 631 38. Whitman WB, Coleman DC, Wiebe WJ, Schwalbach MS, Brown M V., Green JL,  
632 et al. Prokaryotes: the unseen majority. *Proceedings of the National Academy of*  
633 *Sciences of the United States of America* 1998; **95**: 6578–83.
- 634 39. Katoh K, Misawa K, Kuma K, Miyata T. MAFFT: a novel method for rapid  
635 multiple sequence alignment based on fast Fourier transform. *Nucleic Acids*  
636 *Research* 2002; **30**: 3059–3066.
- 637 40. John SG, Mendez CB, Deng L, Poulos B, Kauffman AKM, Kern S, et al. A simple  
638 and efficient method for concentration of ocean viruses by chemical flocculation.  
639 *Environmental Microbiology Reports* 2011; **3**: 195–202.
- 640 41. Hurwitz BL, Deng L, Poulos BT, Sullivan MB. Evaluation of methods to  
641 concentrate and purify ocean virus communities through comparative, replicated  
642 metagenomics. *Environmental microbiology* 2013; **15**: 1428–40.
- 643 42. Kimura S, Yoshida T, Hosoda N, Honda T, Kuno S, Kamiji R, et al. Diurnal  
644 infection patterns and impact of *Microcystis* cyanophages in a Japanese pond.  
645 *Applied and Environmental Microbiology* 2012; **78**: 5805–5811.
- 646 43. Bankevich A, Nurk S, Antipov D, Gurevich AA, Dvorkin M, Kulikov AS, et al.  
647 SPAdes: A new genome assembly algorithm and its applications to single-cell  
648 sequencing. *Journal of Computational Biology* 2012; **19**: 455–477.
- 649 44. Nishimura Y, Watai H, Honda T, Mihara T, Omae K, Roux S, et al. Environmental  
650 Viral Genomes Shed New Light on Virus-Host Interactions in the Ocean. *mSphere*  
651 2017; **2**: e00359-16.
- 652 45. Li W, Godzik A. Cd-hit: A fast program for clustering and comparing large sets of  
653 protein or nucleotide sequences. *Bioinformatics* 2006; **22**: 1658–1659.
- 654 46. Nayfach S, Camargo AP, Schulz F, Eloie-Fadrosh E, Roux S, Kyrpides NC.  
655 CheckV assesses the quality and completeness of metagenome-assembled viral  
656 genomes. *Nature Biotechnology* 2020; 1–8.
- 657 47. Nishimura Y, Yoshida T, Kuronishi M, Uehara H, Ogata H, Goto S. ViPTree: the  
658 viral proteomic tree server. *Bioinformatics* 2017; **33**: 2379–2380.
- 659 48. Langmead B, Salzberg SL. Fast gapped-read alignment with Bowtie 2. *Nature*  
660 *Methods* 2012; **9**: 357–359.
- 661 49. Mihara T, Nishimura Y, Shimizu Y, Nishiyama H, Yoshikawa G, Uehara H, et al.  
662 Linking Virus Genomes with Host Taxonomy. *Viruses* 2016; **8**: 66.
- 663 50. Zhang Z, Qin F, Chen F, Chu X, Luo H, Zhang R, et al. Culturing novel and  
664 abundant pelagiphages in the ocean. *Environmental Microbiology* 2020; 1462-  
665 2920.15272.

- 666 51. Paez-Espino D, Eloë-Fadrosh EA, Pavlopoulos GA, Thomas AD, Huntemann M,  
667 Mikhailova N, et al. Uncovering Earth’s virome. *Nature* 2016; **536**: 425–430.
- 668 52. Roux S, Brum JR, Dutilh BE, Sunagawa S, Duhaime MB, Loy A, et al.  
669 Ecogenomics and potential biogeochemical impacts of globally abundant ocean  
670 viruses. *Nature* 2016; **537**: 689–693.
- 671 53. Gregory AC, Zayed AA, Conceição-Neto N, Temperton B, Bolduc B, Alberti A, et  
672 al. Marine DNA Viral Macro- and Microdiversity from Pole to Pole. *Cell* 2019;  
673 **177**: 1109-1123.e14.
- 674 54. Mizuno CM, Ghai R, Saghāi A, López-García P, Rodríguez-Valeraa F. Genomes  
675 of abundant and widespread viruses from the deep ocean. *mBio* 2016; **7**.
- 676 55. Luo E, Aylward FO, Mende DR, DeLong EF. Bacteriophage Distributions and  
677 Temporal Variability in the Ocean’s Interior. *mBio* 2017; **8**: e01903-17.
- 678 56. Tully BJ, Graham ED, Heidelberg JF. The reconstruction of 2,631 draft  
679 metagenome-assembled genomes from the global oceans. *Scientific Data* 2018; **5**:  
680 170203.
- 681 57. Tully BJ, Sachdeva R, Graham ED, Heidelberg JF. 290 metagenome-assembled  
682 genomes from the Mediterranean Sea: a resource for marine microbiology. *PeerJ*  
683 2017; **5**: e3558.
- 684 58. Delmont TO, Quince C, Shaiber A, Esen ÖC, Lee ST, Rappé MS, et al. Nitrogen-  
685 fixing populations of Planctomycetes and Proteobacteria are abundant in surface  
686 ocean metagenomes. *Nature Microbiology* 2018; **3**: 804–813.
- 687 59. Krüger K, Chafee M, Ben Francis T, Glavina del Rio T, Becher D, Schweder T, et  
688 al. In marine Bacteroidetes the bulk of glycan degradation during algae blooms is  
689 mediated by few clades using a restricted set of genes. *ISME Journal* 2019; **13**:  
690 2800–2816.
- 691 60. Pachiadaki MG, Brown JM, Brown J, Bezuidt O, Berube PM, Biller SJ, et al.  
692 Charting the Complexity of the Marine Microbiome through Single-Cell  
693 Genomics. *Cell* 2019; **179**: 1623-1635.e11.
- 694 61. Roux S, Enault F, Hurwitz BL, Sullivan MB. VirSorter: mining viral signal from  
695 microbial genomic data. *PeerJ* 2015; **3**: e985.
- 696 62. Bland C, Ramsey TL, Sabree F, Lowe M, Brown K, Kyrpides NC, et al. CRISPR  
697 Recognition Tool (CRT): a tool for automatic detection of clustered regularly  
698 interspaced palindromic repeats. *BMC Bioinformatics* 2007; **8**: 209.
- 699 63. Grissa I, Vergnaud G, Pourcel C. The CRISPRdb database and tools to display  
700 CRISPRs and to generate dictionaries of spacers and repeats. *BMC Bioinformatics*  
701 2007; **8**: 172.

- 702 64. Camacho C, Coulouris G, Avagyan V, Ma N, Papadopoulos J, Bealer K, et al.  
703 BLAST+: architecture and applications. *BMC Bioinformatics* 2009; **10**: 421.
- 704 65. Laslett D, Canback B. ARAGORN, a program to detect tRNA genes and tmRNA  
705 genes in nucleotide sequences. *Nucleic Acids Research* 2004; **32**: 11–16.
- 706 66. Chan PP, Lowe TM. GtRNAdb 2.0: An expanded database of transfer RNA genes  
707 identified in complete and draft genomes. *Nucleic Acids Research* 2016; **44**:  
708 D184–D189.
- 709 67. Oksanen J, Blanchet FG, Friendly M, Kindt R, Legendre P, Mcglinn D, et al.  
710 vegan: Community Ecology Package. 2020.
- 711 68. Dixon P. VEGAN, a package of R functions for community ecology. *Journal of*  
712 *Vegetation Science* 2003; **14**: 927–930.
- 713 69. Xia LC, Steele JA, Cram JA, Cardon ZG, Simmons SL, Vallino JJ, et al. Extended  
714 local similarity analysis (eLSA) of microbial community and other time series data  
715 with replicates. *BMC Systems Biology* 2011; **5**: S15.
- 716 70. Xia LC, Ai D, Cram J, Fuhrman JA, Sun F. Efficient statistical significance  
717 approximation for local similarity analysis of high-throughput time series data.  
718 *Bioinformatics* 2013; **29**: 230–237.
- 719 71. Shannon P, Markiel A, Ozier O, Baliga NS, Wang JT, Ramage D, et al. Cytoscape:  
720 A software Environment for integrated models of biomolecular interaction  
721 networks. *Genome Research* 2003; **13**: 2498–2504.
- 722 72. Li H. A statistical framework for SNP calling, mutation discovery, association  
723 mapping and population genetical parameter estimation from sequencing data.  
724 *Bioinformatics* 2011; **27**: 2987–2993.
- 725 73. Roux S, Adriaenssens EM, Dutilh BE, Koonin E V., Kropinski AM, Krupovic M,  
726 et al. Minimum information about an uncultivated virus genome (MIUVIG).  
727 *Nature Biotechnology* 2019; **37**: 29–37.
- 728 74. Parada V, Herndl GJ, Weinbauer MG. Viral burst size of heterotrophic prokaryotes  
729 in aquatic systems. *Journal of the Marine Biological Association of the United*  
730 *Kingdom* . 2006. Cambridge University Press. , **86**: 613–621
- 731 75. Sullivan MB, Waterbury JB, Chisholm SW. Cyanophages infecting the oceanic  
732 cyanobacterium *Prochlorococcus*. *Nature* 2003; **424**: 1047–1051.
- 733 76. Waterbury JB, Valois FW. Resistance to co-occurring phages enables marine  
734 *Synechococcus* communities to coexist with cyanophages abundant in seawater.  
735 *Applied and Environmental Microbiology* 1993; **59**: 3393–3399.

- 736 77. Sullivan MB, Coleman ML, Weigele P, Rohwer F, Chisholm SW. Three  
737 Prochlorococcus Cyanophage Genomes: Signature Features and Ecological  
738 Interpretations. *PLoS Biology* 2005; **3**: e144.
- 739 78. Suttle CA, Chan AM. Marine cyanophages infecting oceanic and coastal strains of  
740 Synechococcus: abundance, morphology, cross-infectivity and growth  
741 characteristics. *Marine Ecology Progress Series* 1993; **92**: 99–109.
- 742 79. Suttle CA, Chan AM. Dynamics and distribution of cyanophages and their effect  
743 on marine Synechococcus spp. *Applied and Environmental Microbiology* 1994;  
744 **60**: 3167–3174.
- 745 80. Kimura S, Sako Y, Yoshida T. Rapid Microcystis Cyanophage Gene  
746 Diversification Revealed by Long- and Short-Term Genetic Analyses of the Tail  
747 Sheath Gene in a Natural Pond. *Appl Environ Microbiol* 2013; **79**: 2789–2795.
- 748 81. Cohan FM, Perry EB. A Systematics for Discovering the Fundamental Units of  
749 Bacterial Diversity. *Current Biology* . 2007. Cell Press. , **17**: R373–R386
- 750 82. Kimura S, Uehara M, Morimoto D, Yamanaka M, Sako Y, Yoshida T. Incomplete  
751 selective sweeps of Microcystis population detected by the leader-end CRISPR  
752 fragment analysis in a natural pond. *Frontiers in Microbiology* 2018; **9**: 425.
- 753 83. Koskella B, Brockhurst MA. Bacteria-phage coevolution as a driver of ecological  
754 and evolutionary processes in microbial communities. *FEMS Microbiology*  
755 *Reviews* 2014; **38**: 916–931.
- 756 84. Thingstad TF, Vage S, Storesund JE, Sandaa RA, Giske J. A theoretical analysis of  
757 how strain-specific viruses can control microbial species diversity. *Proceedings of*  
758 *the National Academy of Sciences of the United States of America* 2014; **111**:  
759 7813–7818.

760

## 761 **Figure legends**

762

### 763 **Figures**

764 **Figure 1. Seasonality of the prokaryotes and viruses at the Osaka Bay (OB) during**  
765 **observation.**

766 The Bray-Curtis community similarity index was calculated among all of the possible  
767 sample pairs from normalized abundances of prokaryotic OTUs and OBV contigs and  
768 plotted as a function of the number of months separating their sampling.

769 **Figure 2. Comparison of prokaryotic and viral taxonomic community composition**  
770 **based on the host prediction.**

771 (A) Relative abundance of phylogenetic groups of prokaryotic communities. Quality-  
772 controlled reads were clustered into OTUs with sequence identity of 99% using  
773 VSEARCH (Rognes et al., 2016). These OTUs were classified at the phylum level (class  
774 level for Proteobacteria) using SINA (Pruesse et al., 2012).

775 (B) Relative abundance of viruses based on their putative hosts assigned by host  
776 prediction. Normalized abundances of viral contigs were calculated from fragments per  
777 kilobase of per million reads mapped (FPKM) value.

778

779 **Figure 3. Broad overview of detected positive correlations between prokaryotic**  
780 **ASVs and viral populations which potentially infect each prokaryotic taxa based**  
781 **on host prediction analysis.**

782 (A) Flavobacteria and their viruses. (B)  $\alpha$ -proteobacteria and viruses. (C)  $\gamma$ -  
783 proteobacteria and their viruses. (D) Cyanobacteria and their viruses. (E) Other major  
784 groups (SAR324, Marine group II, and Actinobacteria) and their viruses. Prokaryotic  
785 nodes are circles and viral node are v-shapes. Node color indicates prokaryotic taxa.  
786 Solid lines are positive correlations.

787

788 **Figure 4. Increase of viral abundance according to the host cell density between co-**  
789 **occurring host-virus pairs.**

790 Normalized relative rank of each virus in community (0 ~1) were plotted when their  
791 putative host relative abundance exceeding 1% ( $\cong 10^4$  cells/ml, yellow), 0.1% ( $\cong 10^3$   
792 cells/ml, green), and below 0.1% (blue). Boxplots are constructed with the upper and  
793 lower lines corresponding to the 25th and 75th percentiles; outliers are displayed as  
794 points.

795

796 **Figure 5. Dynamics of the most dominant prokaryotic population (ASV1-1 and**  
797 **ASV8-1) with viruses which predicted to infect these host taxa by host prediction**  
798 **analysis but did not co-occurred with any ASV.**

799 (A) Dynamics of ASV8-1 which classified into *Synechococcus* and 53 cyanoviruses  
800 which did not co-occurred with cyanobacterial ASVs. (B) Area chart represents relative  
801 abundance of the ASV8-1 and lines represents viral contigs over time. The panels were  
802 separated by viral annual pattern (2015 type, 2016 type, and both years, if the virus was  
803 more than five times abundant in one year comparing with another year, the virus was  
804 defined as year-specific virus). Colors represent gOTU (genus) of the virus. (B) Dynamics  
805 of ASV1-1 which classified into SAR11 clade and 309 putative SAR11 viruses which did  
806 not co-occurred with any SAR11 ASVs. Area chart represents relative abundance of the

807 ASV1-1 and lines represents viral contigs over time. The panel were separated based on  
808 the classified gOTUs of each virus.

809

### 810 **Supplementary Figure/Tables**

811

#### 812 **Supplementary Figure S1. Virome abundance of OBV long contigs as assessed by** 813 **putative *terL* genes.**

814 Abundance of 1,078 mts-OBV long contigs (indicated by red) was assessed by the  
815 abundance of putative *terL* genes (from 4,666 contigs in total). y-axis represents the *terL*  
816 FPKM of each virus. Contigs (x-axis) are lined in order of the assembled month (from  
817 2015 May to 2016 Nov ).

818

#### 819 **Supplementary Figure S2. Alpha diversity profiles of prokaryotic and viral** 820 **communities in Osaka bay during observation.**

821 Average of Shannon H' (A), richness (number of OTUs or contigs, C), and evenness  
822 (Pielou's j: Shannon diversity divided by log richness, E) were calculated from  
823 normalized abundances of prokaryotic OTUs based on rarefied reads and viral contigs  
824 from fragments per kilobase of per million reads mapped (FPKM) value. The boxes  
825 represent the first quartile, median, and third quartile. Asterisks denote significance  
826 (Student's t-test adjusted by Bonferroni correction., \*\*\*p< 0.001). The change of  
827 Shannon H' (B), richness (D), and evenness (F) of prokaryotic and viral communities of  
828 the time-series were plotted.

829

#### 830 **Supplementary Figure S3. Changes in environmental parameters at the Osaka Bay** 831 **(OB).**

832 Heatmap represents z-score transformed value of measured environmental parameters.

833

#### 834 **Supplementary Figure S4. Relationship of relative abundance of prokaryotic taxa** 835 **and viruses predicted to infect the corresponding prokaryotic taxa.**

836 x-axis indicate relative abundance of viruses at each month. y-axis indicate relative  
837 abundance of prokaryotes at corresponding month. Pro indicate the prokaryotic taxa and  
838 Vir indicate putative host of the viruses.

#### 839 **Supplementary Figure S5. Dynamics of abundant prokaryotic OTUs and its** 840 **decomposed ASVs.**

841 The yellow area-graph represents the relative abundance over time of each abundant OTU  
842 as a proportion of the whole community. The colored lines are the estimated relative  
843 abundance of each ASV (only >0.1% in abundance among whole community are shown)  
844 as a proportion of the whole community of prokaryotic sequences.

845

846 **Supplementary Figure S6. Dynamics of ASVs and their co-occurring viruses**

847 The yellow area-graph represents the normalized relative abundance (0 to 1) over time of  
848 each ASV. The dashed lines represents the normalized relative abundance (0 to 1) over  
849 time of each viruses which co-occurred with the ASVs. Only up to top 30 most abundant  
850 co-occurred viruses were show for each ASV.

851

852 **Supplementary Figure S7. Plots of relative abundance of co-occurring host-virus  
853 pairs.**

854 Relative abundance of each prokaryotic ASV and their co-occurring viruses at each  
855 month were shown. Black and red dot-lines represents  $10^3$  cells/ml and  $10^4$  cells/ml of  
856 host abundance, respectively.

857

858 **Supplementary Figure S8. Comparison of relative rank of viruses and host ASVs  
859 abundance among co-occurring host-virus pairs.**

860 Normalized relative rank of each virus in community (0 ~1) were plotted when their  
861 putative host ASV relative abundance exceeding 1% ( $\cong 10^4$  cells/ml, yellow), 0.1% ( $\cong$   
862  $10^3$  cells/ml, green), and below 0.1% (blue). Boxplots are constructed with the upper and  
863 lower lines corresponding to the 25th and 75th percentiles; outliers are displayed as points.

864

865 **Supplementary Figure S9. Number of virus-host co-occurring pairs by taxa.**

866 Number of detected viruses by host prediction of each host taxa were shown as blue (first  
867 y-axis) and number of co-occurring viruses per an ASV (on average) by host taxa were  
868 show as yellow (second y-axis).

869

870 **Supplementary Figure S10. Distribution of the number of co-occurring viruses  
871 among prokaryotic ASVs based on their growth strategy inferred from  
872 approximated index of carrying capacity (K) and intrinsic rate of natural increase  
873 (r) based on their dynamics.**

874 x-axis indicates approximation index of  $r$  and y-axis indicates approximation index of  $K$ .  
875 Size of the circles represents the number of co-occurring viruses with each ASV. Color  
876 of the circles indicate the taxa of each ASV.



877

878 **Figure S11. Correlation of genome average entropy and abundance of OBV**  
879 **contigs calculated from SNP profiles.**

880 The graphs show the average genomic entropy of mts-OBV contigs and read coverage  
881 of the mts-OBV contigs at given time-series samples. The panel were separated based  
882 on the predicted hosts of the mts-OBV contigs.

883

884 **Supplementary Table S1. Basic statistics of microbial and viral genomes used for**  
885 **the host prediction analysis.**

886 **Supplementary Table S2. 16S rRNA amplicon and virome read sequences in each**  
887 **time series samples.**

888 **Supplementary Table S3. Rho values of Partial Mantel tests for prokaryotic and**  
889 **viral communities and environmental parameters.** The value in each box is the Rho  
890 value and data with  $p < 0.005$  are indicated with \* and with  $p < 0.01$  are indicated with  
891 \*\*

892 **Supplementary Table S4. General genomic features and putative hosts of 5,226**  
893 **mts-OBV contigs.**

894 **Supplementary Table S5. Putative virus-host pairs predicted in this study by**  
895 **methods based on CRISPR-spacers, tRNA, and host-virus genomic similarity.**

896

897 **Supplementary Table S6. Detected significant Spearman's correlations ( $r > |0.6|$ ,**  
898  **$p < 0.01, q < 0.05$ ) between environmental variables and dynamics of ASVs.**

899

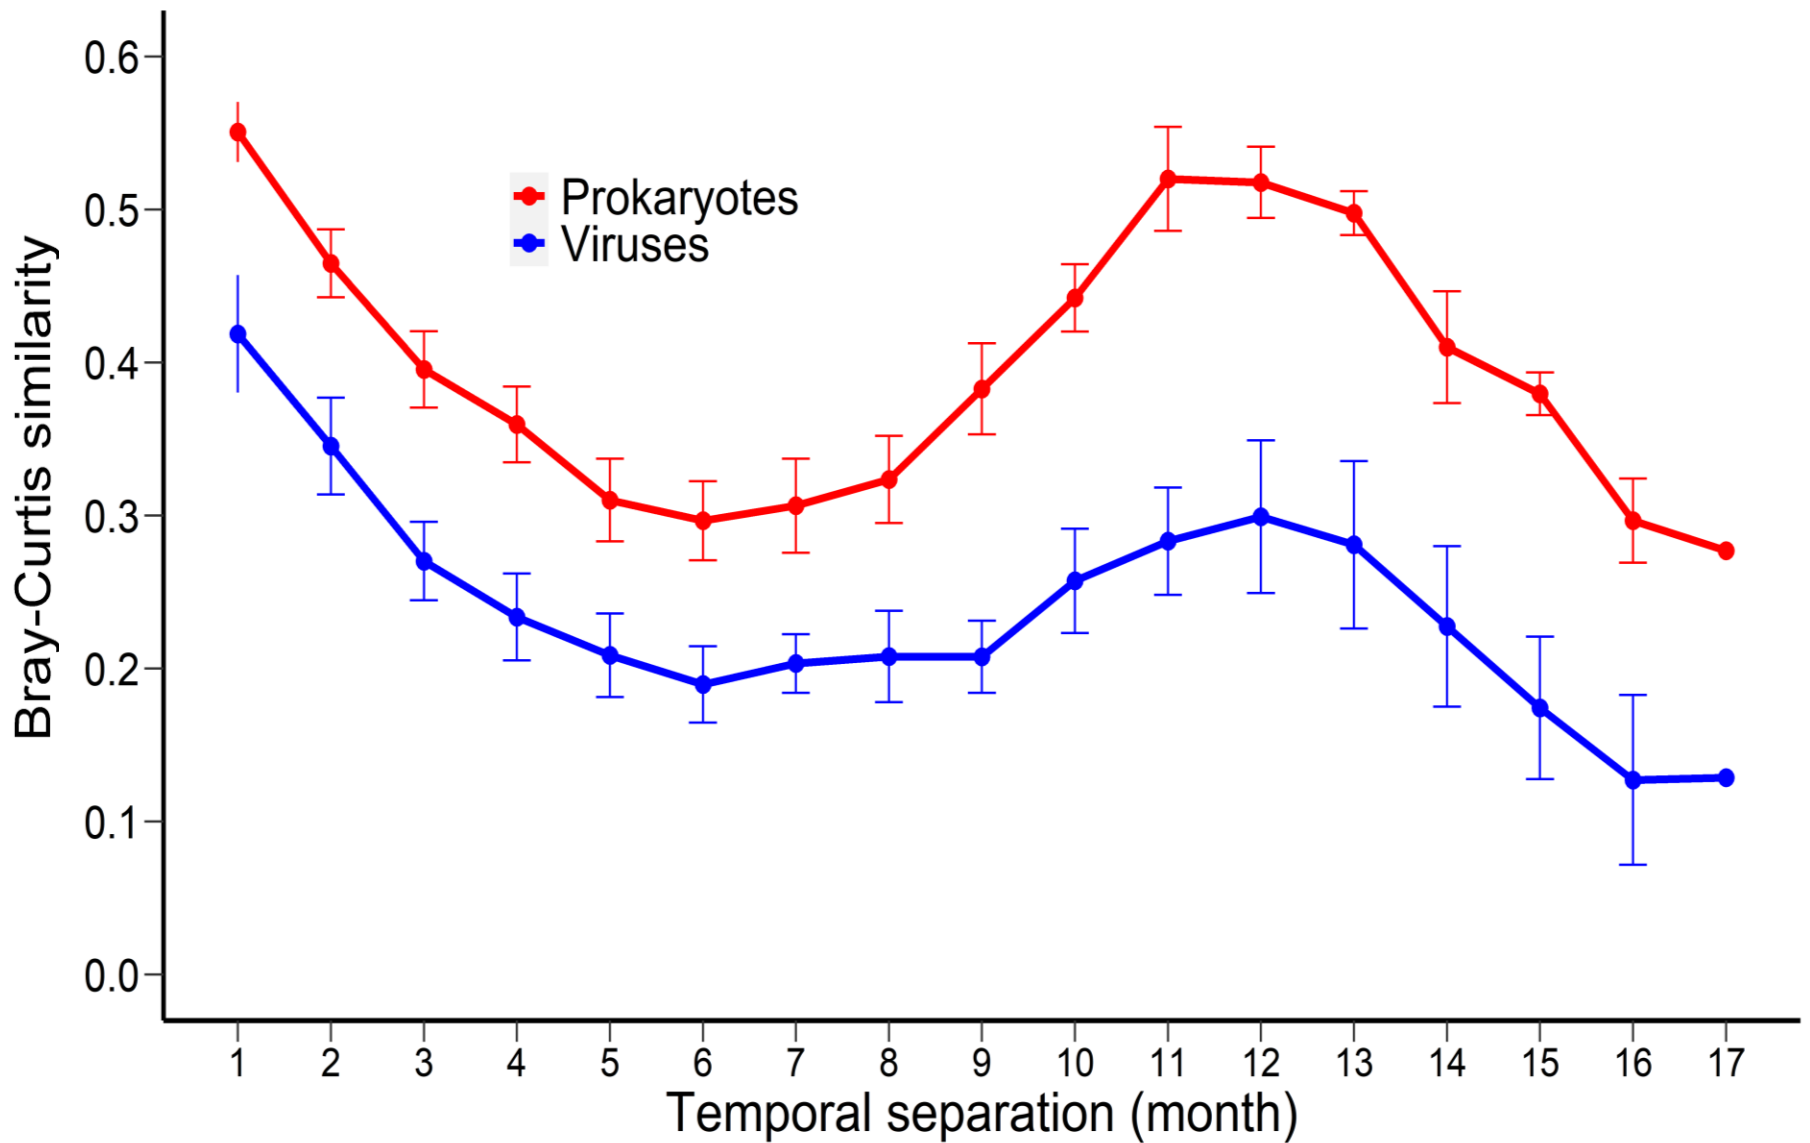

**Figure 1. Seasonality of the prokaryotes and viruses at the Osaka Bay (OB) during observation.**

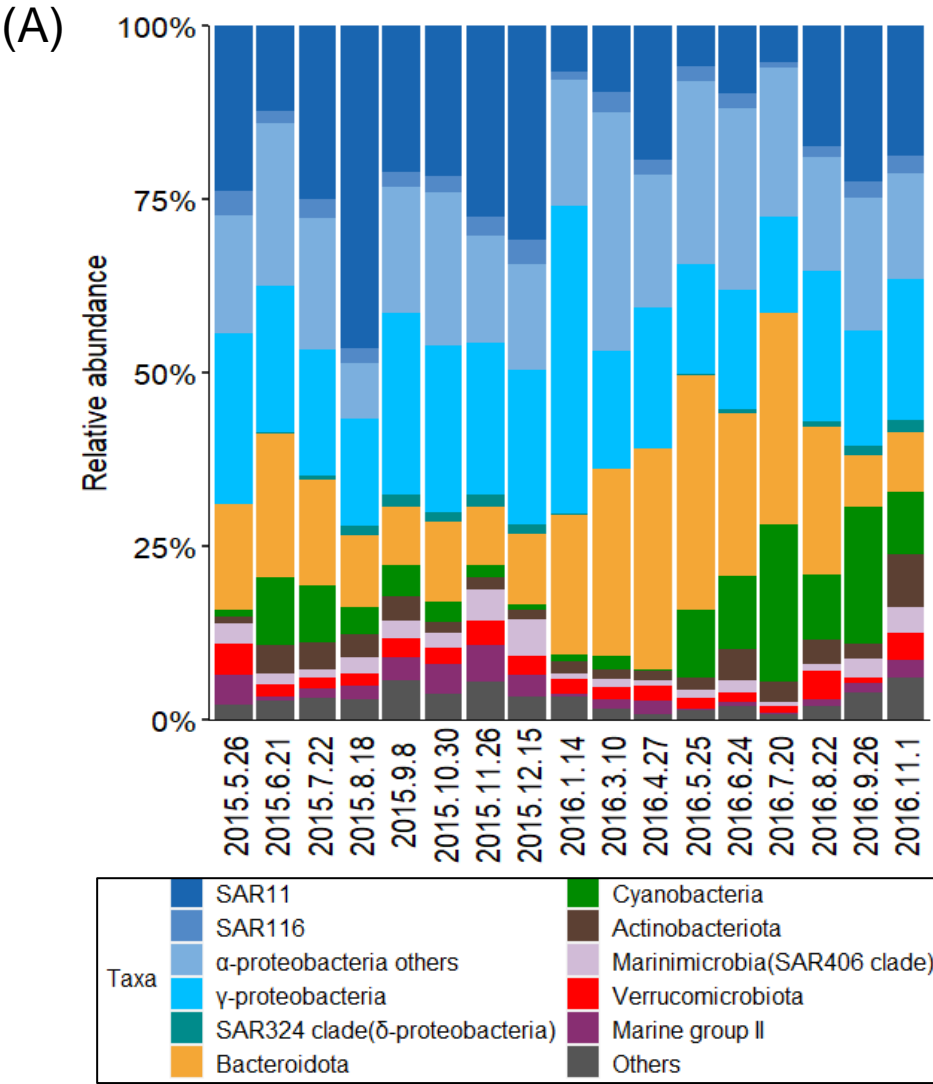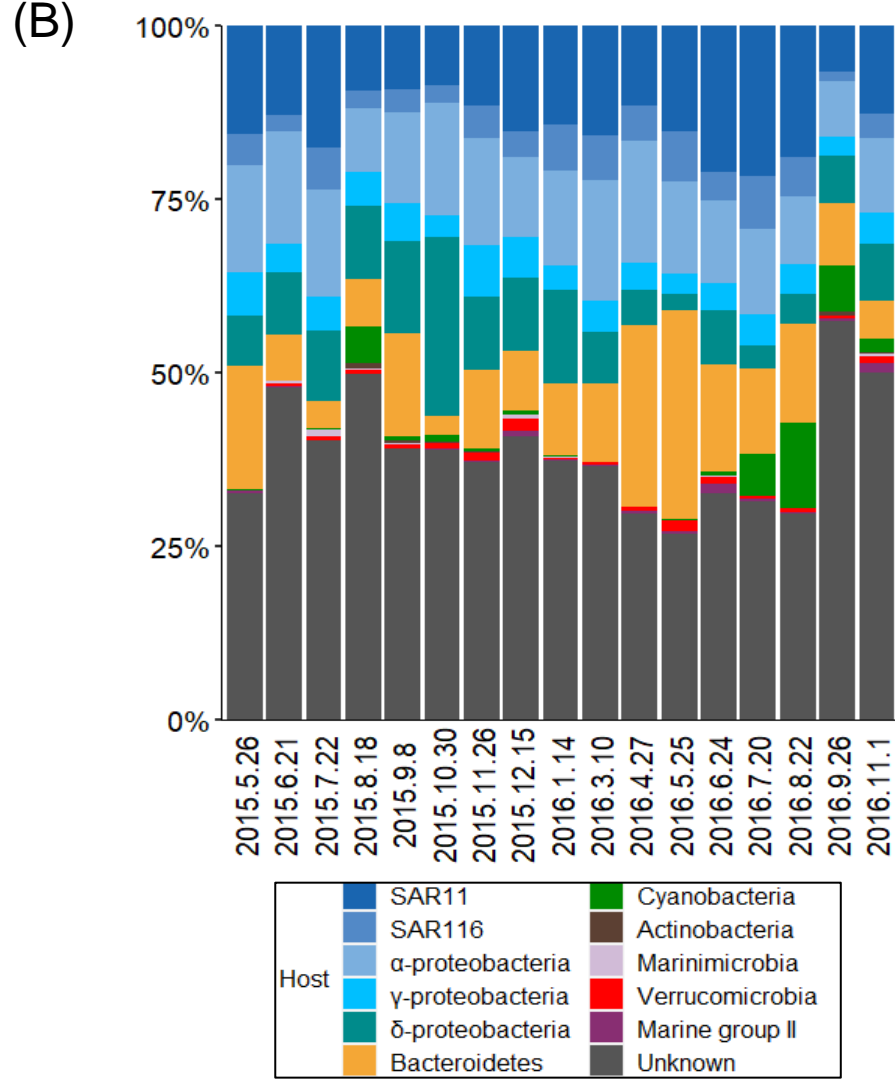

**Figure 2. Comparison of prokaryotic and viral taxonomic community composition based on the host prediction.**

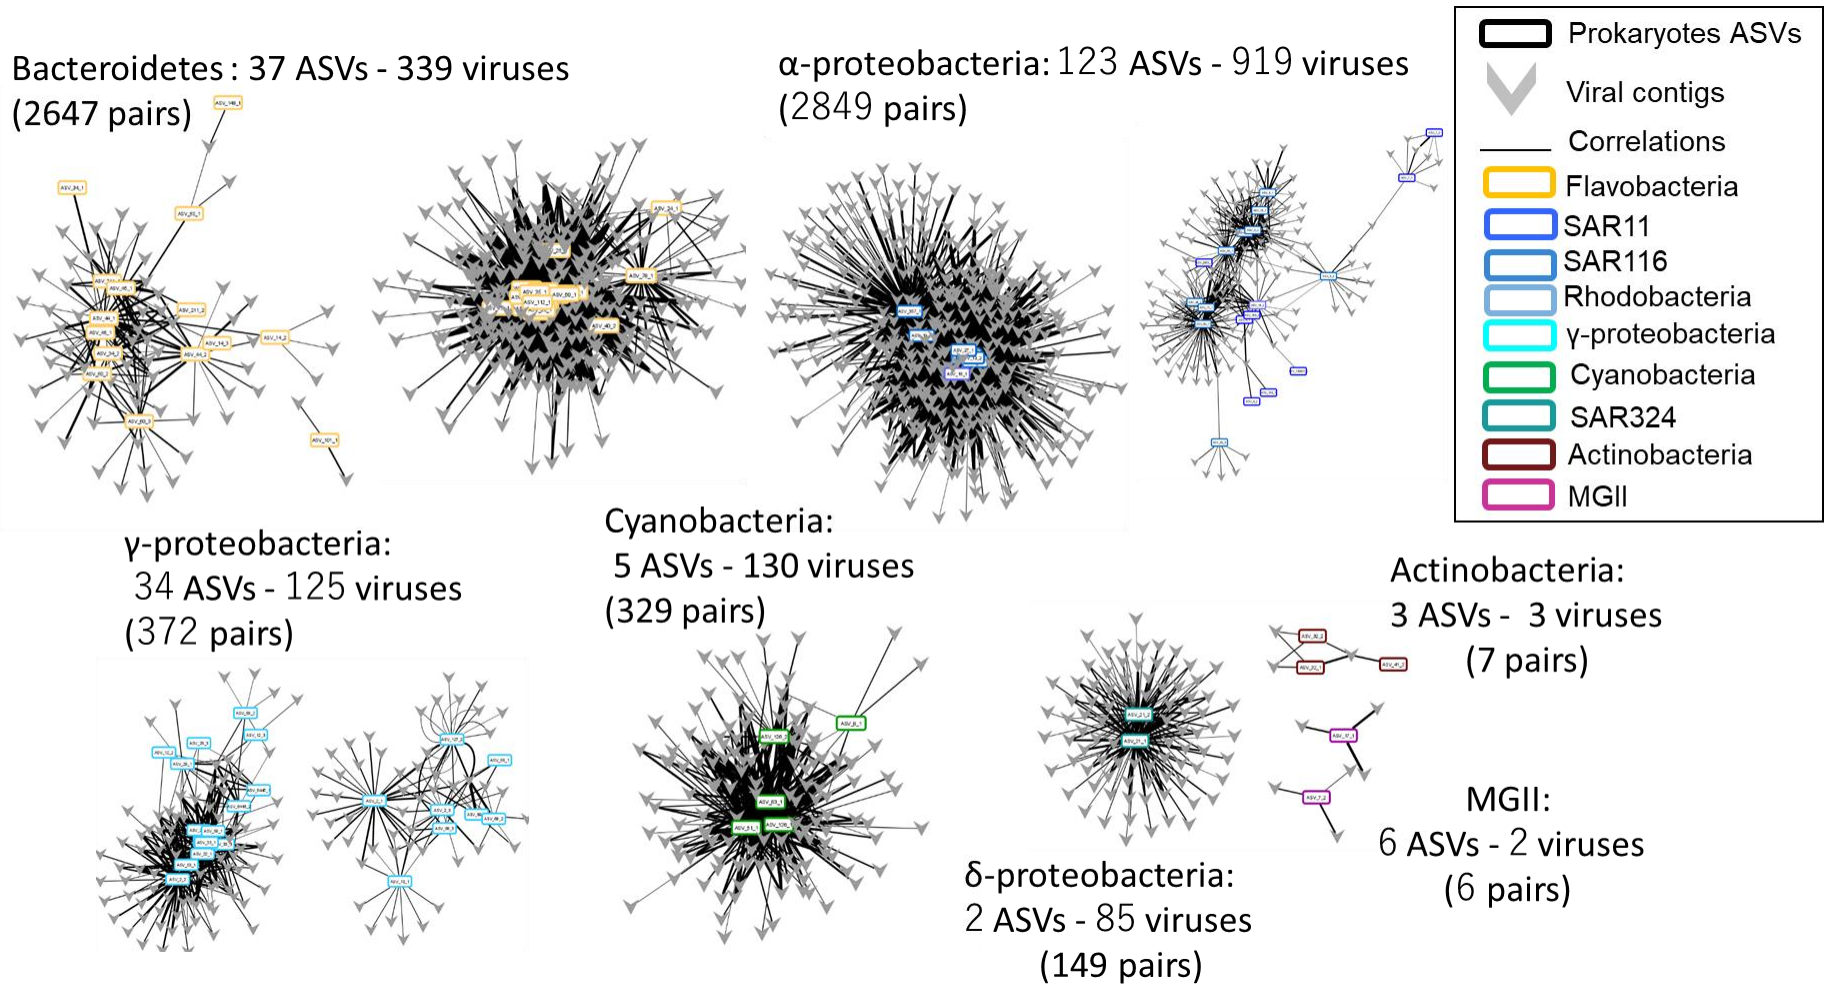

**Figure 3. Broad overview of detected positive correlations between prokaryotic ASVs and viral populations which potentially infect each prokaryotic taxa based on host prediction analysis.**

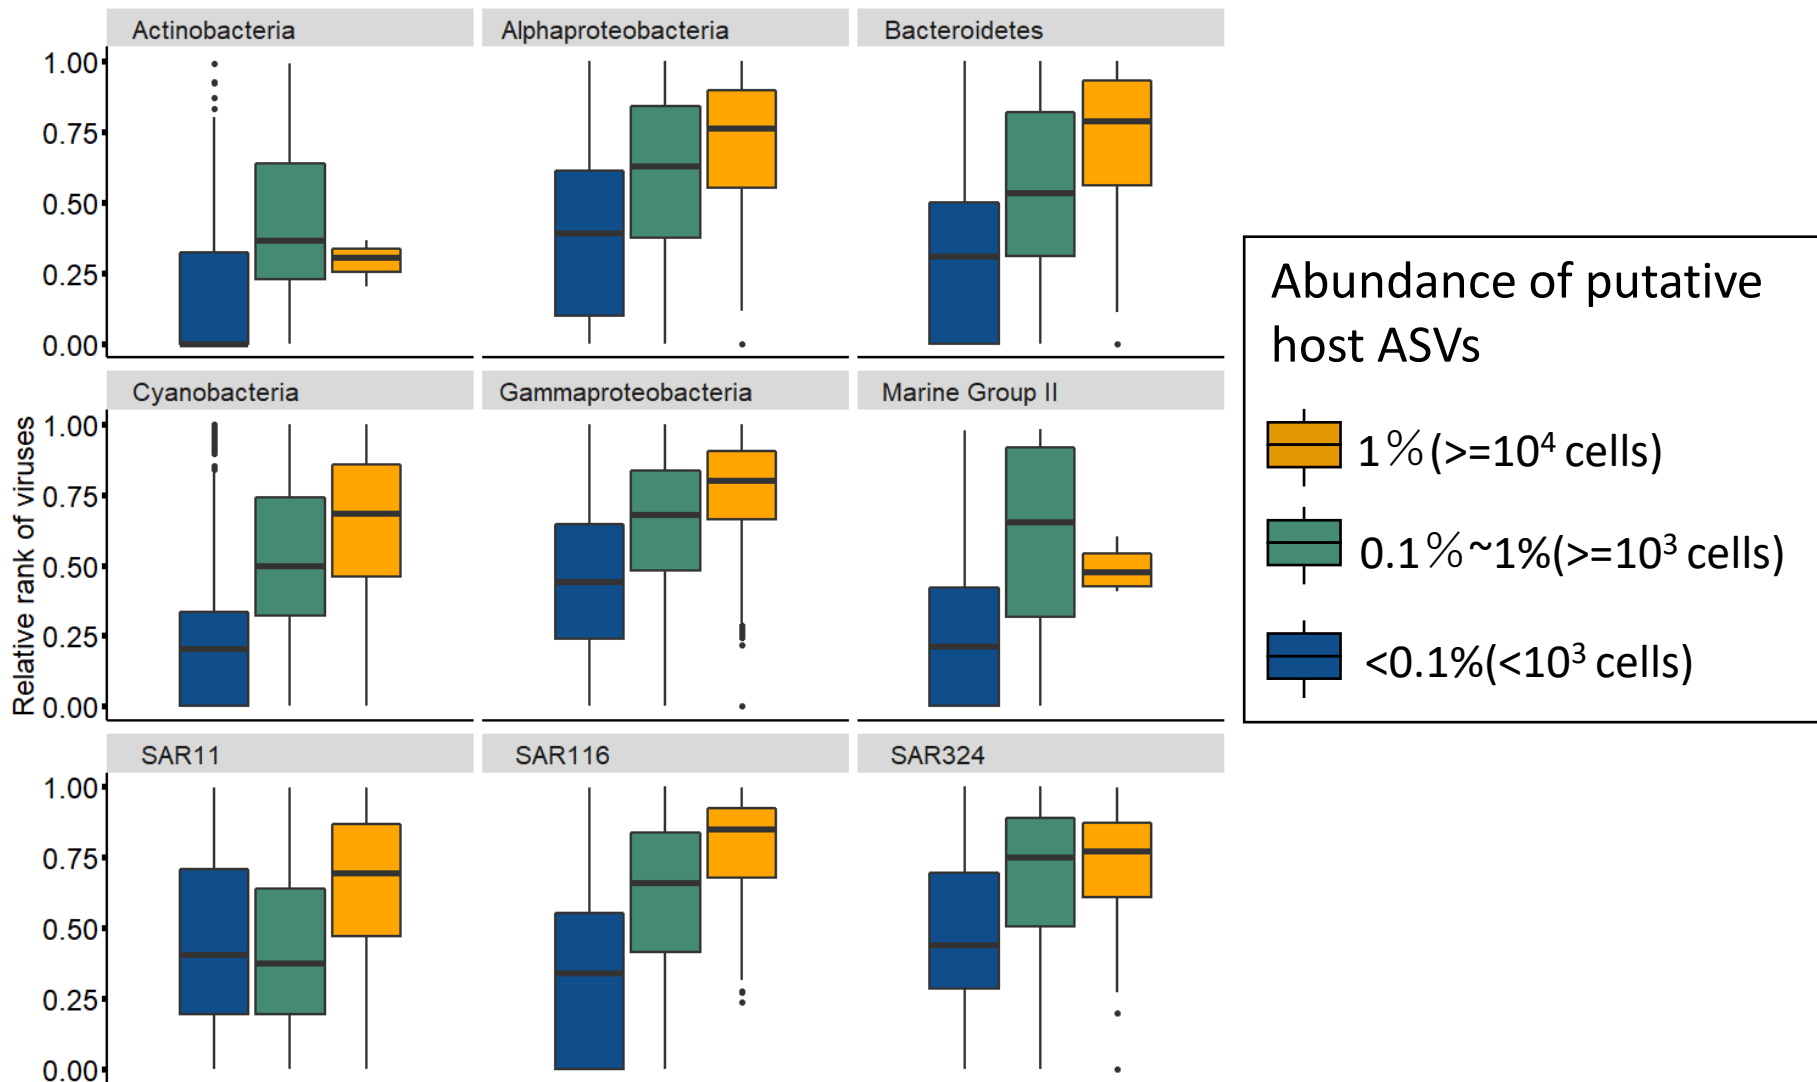

**Figure 4. Increase of viral abundance according to the host cell density between co-occurring host-virus pairs.**

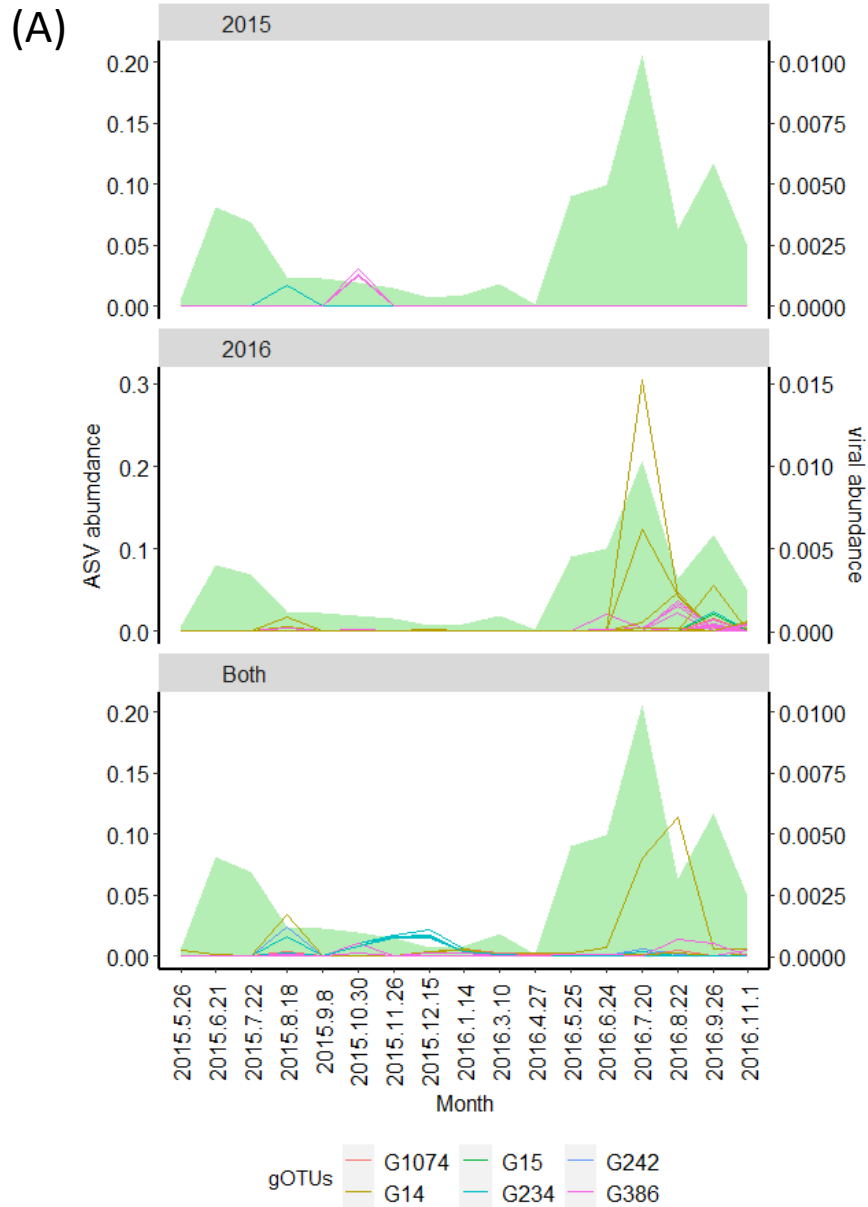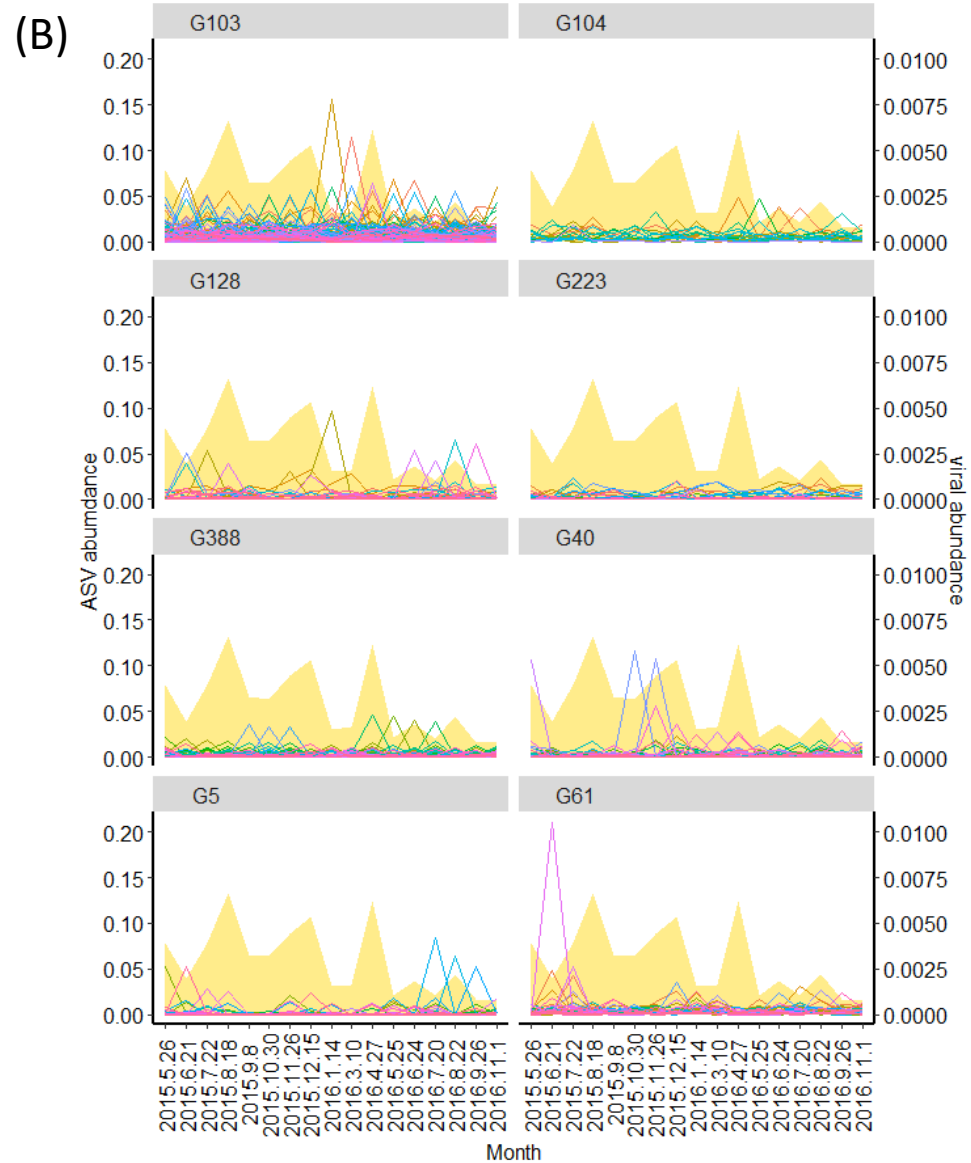

**Figure 5. Dynamics of the most dominant prokaryotic population (ASV1-1 and ASV8-1) with viruses which predicted to infect these host taxa by host prediction analysis but did not co-occurred with any ASV.**
